# Supplementary material
Source: PubMed Central journal article supplement (PMC6761020)
Supplement: NIHMS1531391-supplement-Major_Resource_Table.pdf [file NIHMS1531391-supplement-Major_Resource_Table.pdf]

## Major Resources Tables

### Animals (in vivo studies)

| Species | Vendor or Source                                                            | Background Strain                 | Sex             |
|---------|-----------------------------------------------------------------------------|-----------------------------------|-----------------|
| Mouse   | The Jackson Laboratory                                                      | C56BL/6J                          | Male and Female |
| Mouse   | The Jackson Laboratory                                                      | NOD.CB17-Prkdc <sup>scid</sup> /J | Male and Female |
| Mouse   | Obtained from Prof. Jerry Ware, University of Arkansas for Medical Sciences | IL4R-Ib $\alpha$ Tg               | Male and Female |

### Animal breeding

|                        | Species | Vendor or Source                                                            | Background Strain                 | Other Information |
|------------------------|---------|-----------------------------------------------------------------------------|-----------------------------------|-------------------|
| <b>Parent - Male</b>   | Mouse   | The Jackson Laboratory                                                      | C56BL/6J                          |                   |
| <b>Parent - Female</b> | Mouse   | The Jackson Laboratory                                                      | C56BL/6J                          |                   |
| <b>Parent - Male</b>   | Mouse   | The Jackson Laboratory                                                      | NOD.CB17-Prkdc <sup>scid</sup> /J |                   |
| <b>Parent - Female</b> | Mouse   | The Jackson Laboratory                                                      | NOD.CB17-Prkdc <sup>scid</sup> /J |                   |
| <b>Parent - Male</b>   | Mouse   | Obtained from Prof. Jerry Ware, University of Arkansas for Medical Sciences | IL4R-Ib $\alpha$ Tg               |                   |
| <b>Parent - Female</b> | Mouse   | Obtained from Prof. Jerry Ware, University of Arkansas for Medical Sciences | IL4R-Ib $\alpha$ Tg               |                   |

### Antibodies

| Target antigen       | Vendor or Source | Catalog # | Working concentration                                                  | Lot # (preferred but not required) |
|----------------------|------------------|-----------|------------------------------------------------------------------------|------------------------------------|
| APC anti-mouse CD41  | Biolegend        | 133913    | 5 $\mu$ g/ml                                                           |                                    |
| APC anti-human CD41  | BD Pharmingen    | 559777    | 10 $\mu$ l to stain < 10 <sup>6</sup> platelets in a 10 $\mu$ l sample |                                    |
| FITC anti-mouse CD41 | BD Biosciences   | 553848    | 5 $\mu$ g/ml                                                           |                                    |
| FITC anti-VWF        | Emfret Analytics | P150-1    | 5 $\mu$ l to stain < 10 <sup>6</sup> platelets in a 10 $\mu$ l sample  |                                    |
| HRP anti-VWF         | DAKO             | P0226     | 1:1,000 dilution                                                       |                                    |
