# Supplementary material
Source: PubMed Central journal article supplement (PMC6761020)
Supplement: NIHMS1531391-supplement-Supplemental_Material.pdf [file NIHMS1531391-supplement-Supplemental_Material.pdf]

## Supplementary Figure I

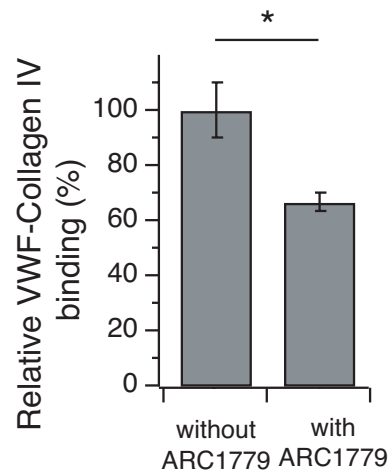

**Supplementary Figure I.** ARC1779 inhibits the interaction between VWF and collagen IV. Human plasma was incubated with 10  $\mu\text{g/ml}$  ARC1779 or saline. Samples were incubated on a collagen IV-coated plate. The interaction between plasma VWF and collagen IV was detected using an HRP-conjugated anti-VWF antibody. The OD at 450 nm was measured and data was normalized to that of plasma treated with saline. Statistical analysis was performed by Student t-test. Data are presented as mean $\pm$ SD (n=3). \*, P < 0.05.

## Supplementary Figure II

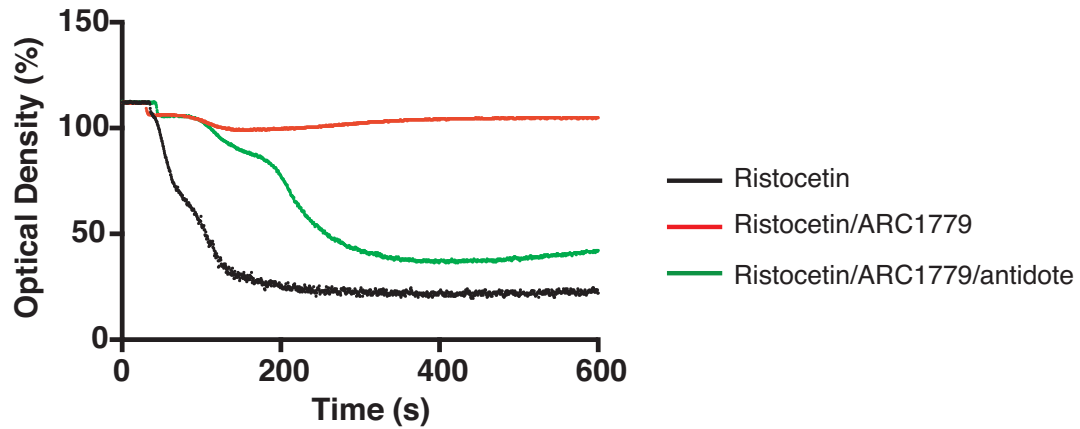

**Supplementary Figure II.** ARC1779 antidote inhibits ARC1779. Human PRPs were incubated with PBS (Black), or 10  $\mu\text{g/ml}$  ARC1779 (Red), or ARC1779/ARC1779 antidote (Green, incubating with 10  $\mu\text{g/ml}$  ARC1779 first for 10 minutes, then incubating with 0.9  $\mu\text{M}$  ARC1779 antidote for 10 minutes). PRPs were stimulated with 0.9 mg/ml ristocetin, and the aggregation was measured via optical density.
